# Supplementary material
Source: publisher figshare collection journal article supplement (https://karger.figshare.com/ndownloader/files/14413433)
Supplement: Supplementary file 1 [file 14413433]

**Supplementary Table S3**. Multivariable odds ratios and 95% confidence intervals for the associations between baseline characteristics and calcium testing

|  | OR (95% CI) | | |
| --- | --- | --- | --- |
|  | CKD Stage 3 | CKD Stage 4 | CKD Stage 5 |
|  | *n* = 640,946 | *n* = 136,278 | *n* = 22,076 |
| Age category |  |  |  |
| 18-64 | 0.91 (0.87-0.96) | 0.90 (0.83-0.97) | 0.92 (0.81-1.05) |
| 65-74 | 1.04 (1.00-1.07) | 1.03 (0.98-1.09) | 1.12 (0.99-1.25) |
| 75-84 | 1 (Ref) | 1 (Ref) | 1 (Ref) |
| ≥ 85 | 0.58 (0.56-0.59) | 0.71 (0.67-0.74) | 0.67 (0.60-0.75) |
| Female | 1.20 (1.17-1.23) | 1.15 (1.11-1.20) | 1.10 (1.01-1.19) |
| Race/ethnicity |  |  |  |
| White | 1 (Ref) | 1 (Ref) | 1 (Ref) |
| Black | 0.66 (0.64-0.69) | 0.74 (0.70-0.78) | 0.73 (0.66-0.81) |
| Asian | 0.84 (0.77-0.92) | 0.82 (0.71-0.95) | 0.97 (0.75-1.26) |
| Hispanic | 0.74 (0.68-0.81) | 0.89 (0.78-1.03) | 0.84 (0.67-1.07) |
| Other | 0.45 (0.42-0.49) | 0.53 (0.47-0.59) | 0.68 (0.54-0.85) |
| Census region |  |  |  |
| Northeast | 0.92 (0.89-0.96) | 0.96 (0.91-1.01) | 0.91 (0.81-1.02) |
| Midwest | 0.92 (0.89-0.95) | 1.04 (0.99-1.10) | 1.01 (0.90-1.13) |
| South | 1 (Ref) | 1 (Ref) | 1 (Ref) |
| West | 0.95 (0.92-0.99) | 1.00 (0.94-1.06) | 0.82 (0.73-0.93) |
| Missing | 0.73 (0.58-0.91) | 0.75 (0.52-1.08) | 0.93 (0.50-1.72) |
| Comorbid conditions |  |  |  |
| Atherosclerotic heart disease | 1.06 (1.03-1.09) | 1.00 (0.95-1.04) | 0.90 (0.82-0.99) |
| Congestive heart failure | 0.68 (0.66-0.70) | 0.65 (0.62-0.69) | 0.65 (0.59-0.72) |
| Dysrhythmia | 0.84 (0.81-0.86) | 0.80 (0.77-0.84) | 0.74 (0.68-0.82) |
| Cerebrovascular disease | 0.78 (0.76-0.81) | 0.81 (0.77-0.85) | 0.69 (0.62-0.76) |
| Peripheral vascular disease | 0.84 (0.82-0.86) | 0.86 (0.83-0.90) | 0.88 (0.80-0.96) |
| Other cardiac | 1.02 (0.99-1.05) | 0.91 (0.87-0.96) | 0.85 (0.77-0.94) |
| COPD | 0.77 (0.75-0.79) | 0.80 (0.76-0.83) | 0.85 (0.78-0.94) |
| Gastrointestinal bleeding | 0.72 (0.67-0.78) | 0.80 (0.72-0.89) | 0.66 (0.54-0.81) |
| Liver disease | 0.61 (0.57-0.65) | 0.69 (0.63-0.77) | 0.59 (0.48-0.73) |
| Cancer | 1.02 (0.99-1.05) | 0.90 (0.85-0.94) | 1.01 (0.89-1.14) |
| Diabetes | 1.11 (1.08-1.14) | 1.01 (0.97-1.05) | 0.98 (0.90-1.07) |
| Hypertension | 1.34 (1.29-1.39) | 1.33 (1.23-1.44) | 1.69 (1.41-2.03) |
| Prior nephrology care | 1.72 (1.67-1.77) | 1.80 (1.73-1.87) | 1.50 (1.37-1.65) |

CI, confidence interval; CKD, chronic kidney disease; COPD, chronic obstructive pulmonary disease; OR, odds ratio.
